# Supplementary material for: Renewable fuel intermediates from furfural over copper-loaded mesoporous aldol condensation catalysts
Source: Royal Society of Chemistry journal article supplement (doi:10.1039/d3se00504f), 2023-01-01
Supplement: d3se00504f1.pdf [file d3se00504f1.pdf]

## Supplementary Data

### Renewable fuel intermediate from furfural over copper-loaded mesoporous aldol condensation catalysts

Priyanga Gandhi, Biswajit Saha, Sundaramurthy Vedachalam and Ajay K. Dalai

Catalysis & Chemical Reaction Engineering Laboratories, Department of Chemical & Biological Engineering, University of Saskatchewan, Saskatoon, SK, Canada

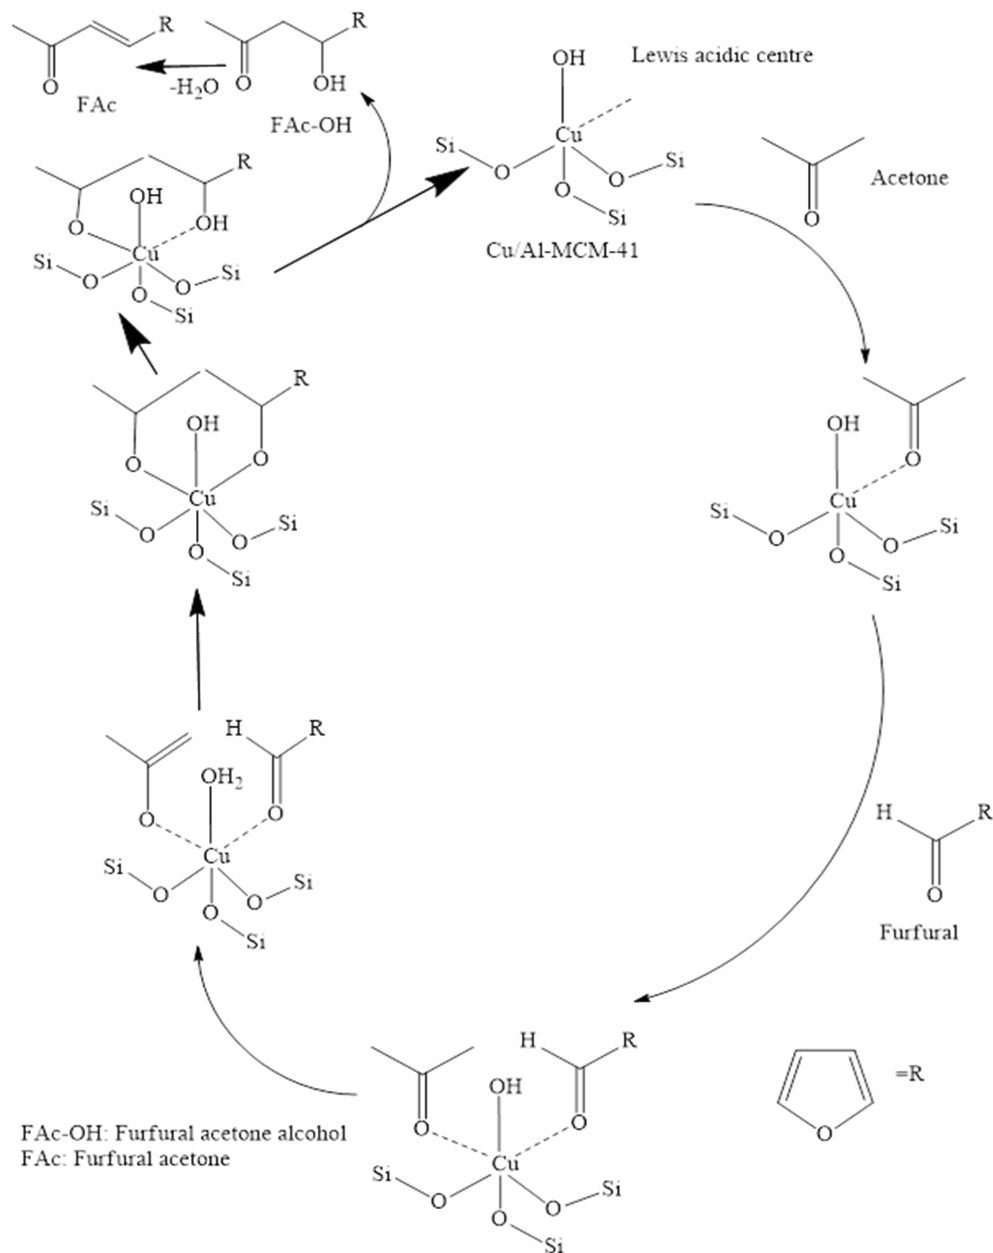

**Figure S1.** Possible mechanism of aldol condensation of furfural and acetone over Cu-impregnated Al-MCM-41 catalyst.

## Supplementary Data

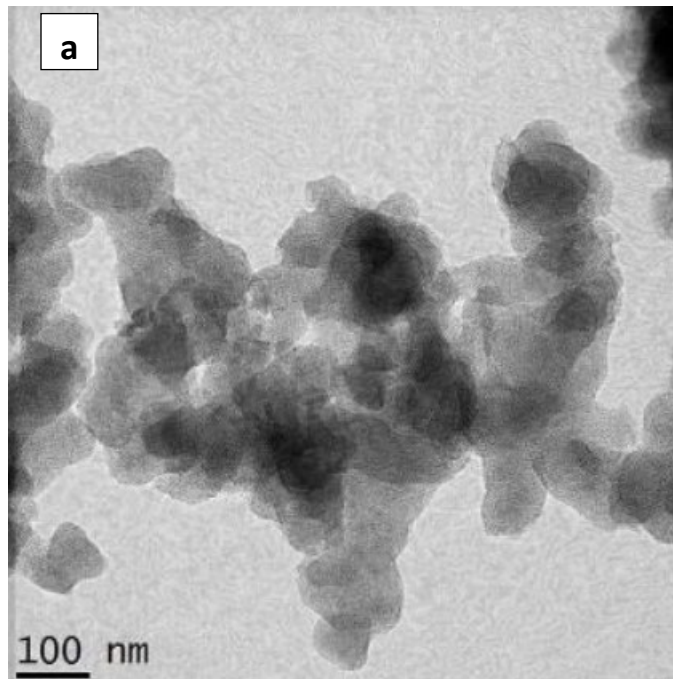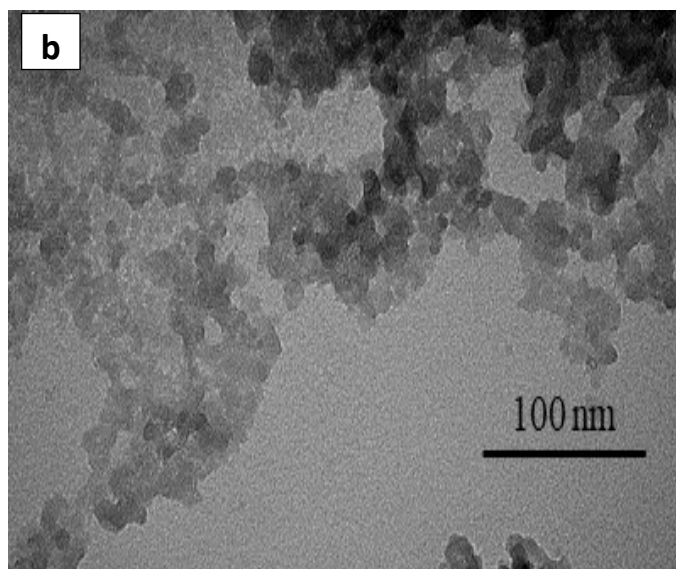

## Supplementary Data

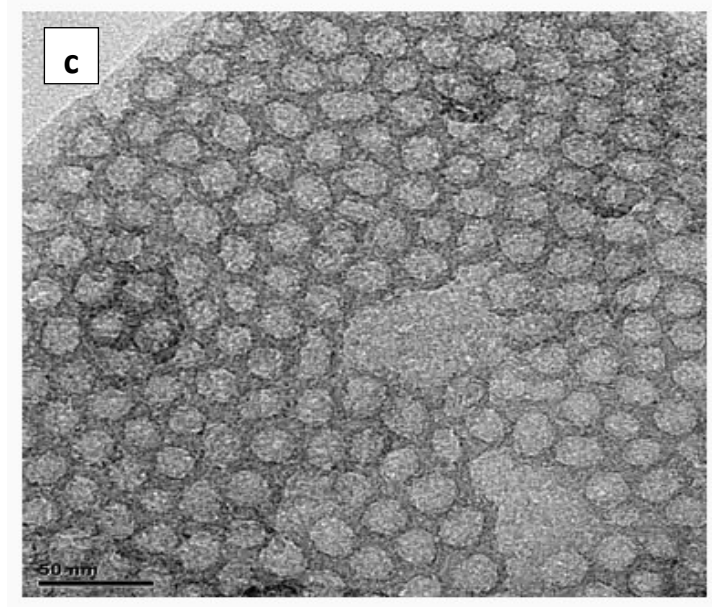

**Figure S2.** TEM of (a) commercial Al-MCM-41, (b) Al-TUD-1 and (c) commercial FDU-12. Note: TEM images of Al-MCM-41 and FDU-12 are provided by ACS Material, LLC.

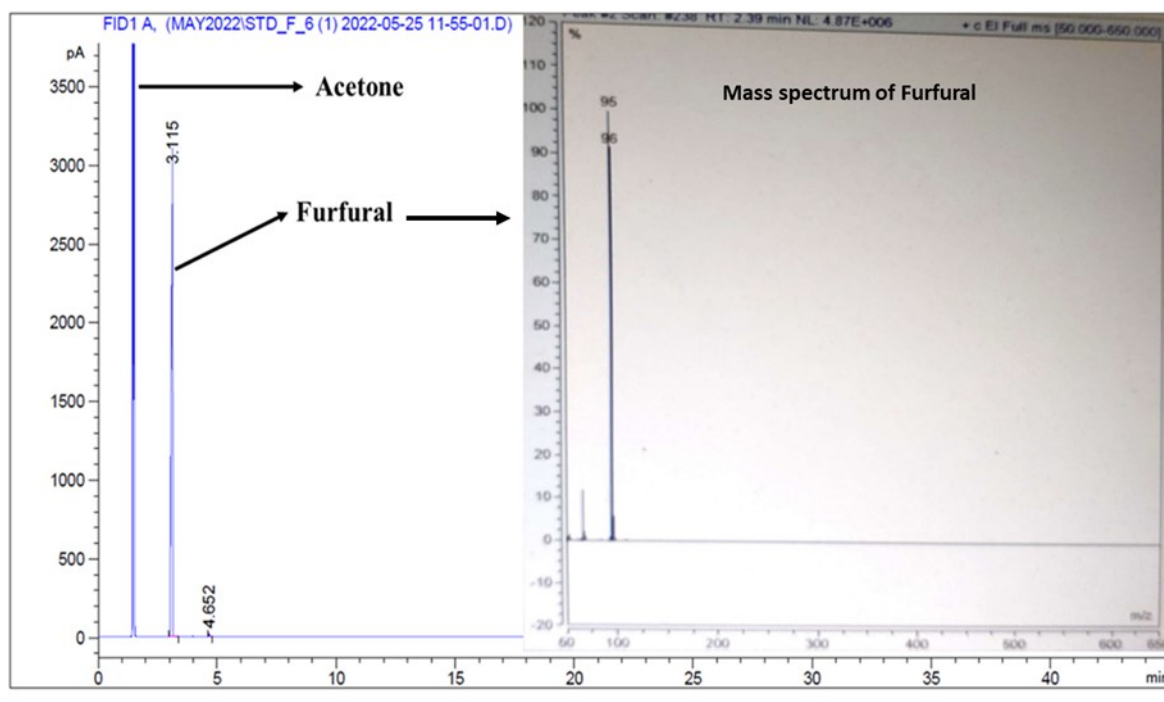

**Figure S3.** GC chromatogram and mass spectrum of reaction mixture before reaction.

## Supplementary Data

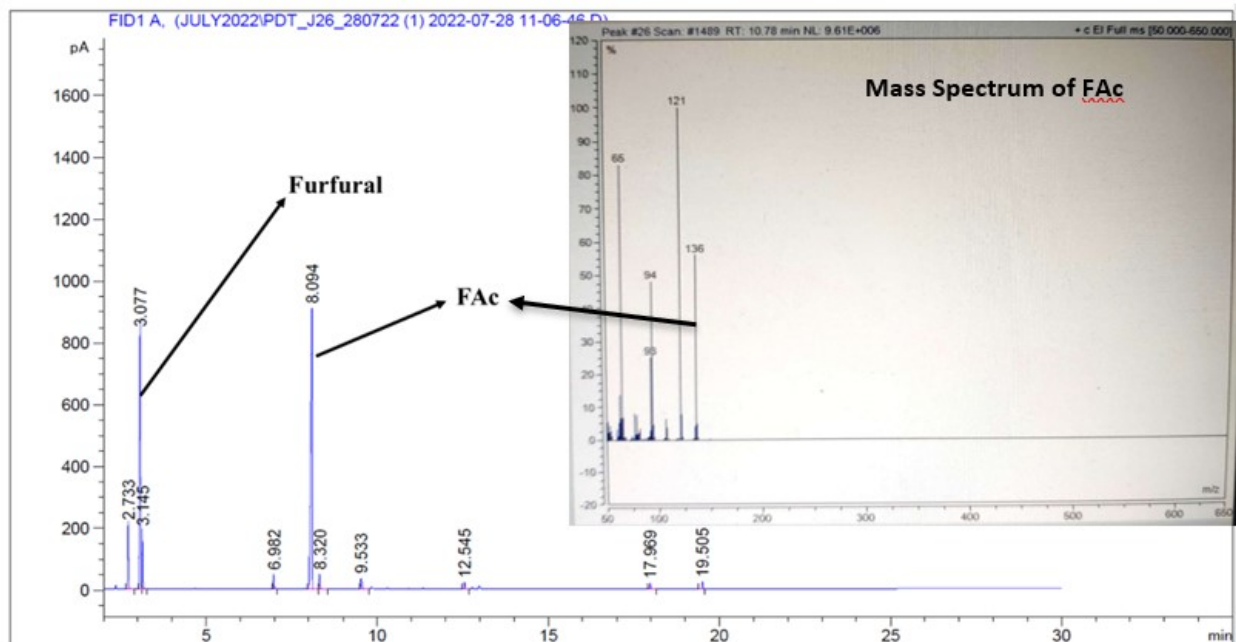

**Figure S4.** GC chromatogram and mass spectrum of product mixture over 20 wt% Cu/Al-MCM-41

**Table S1-** Cu dispersion and turnover frequency of Cu-loaded catalysts

| Catalyst            | Metal dispersion (wt%) | TOF (h <sup>-1</sup> ) |
|---------------------|------------------------|------------------------|
| 20 wt% Cu/Al-MCM-41 | 11                     | 8.17                   |
| 20 wt% Cu/Al-TUD-1  | 8                      | 7.67                   |
| 20 wt% Cu/FDU-12    | 6                      | 6.64                   |
